# Supplementary material
Source: Springer Nature journal article supplement (https://www.springermedizin.de/resource/supplementary/13075_2005_1878_MOESM6_ESM.pdf/9690790)
Supplement: MOESM6 [file 9690790]

**Additional file 6. Differentially expressed genes involved in regulation of protein synthesis and mitochondrial functions.**

| Gene and biological function                                                                                                               | Symbol      | GenBank   | Unigene | M    | LOR  |
|--------------------------------------------------------------------------------------------------------------------------------------------|-------------|-----------|---------|------|------|
| <b>PROTEIN SYNTHESIS</b>                                                                                                                   |             |           |         |      |      |
| ↑(7) Eukaryotic translation elongation factor 1 beta 2<br><i>Regulates transfer of aminoacylated tRNA to ribosome</i>                      | EEF1B2      | X60656    | 421608  | 1.84 | 7.48 |
| ↑(9) Ribosomal protein L38<br><i>Structural constituent of ribosome</i>                                                                    | RPL38       | Z26876    | 380953  | 1.70 | 5.20 |
| ↑(15) Ribosomal protein L12<br><i>Structural constituent of ribosome</i>                                                                   | RPL12       | AF037643  | 408054  | 1.57 | 4.27 |
| ↑(22) Ribosomal protein L9<br><i>Structural constituent of ribosome</i>                                                                    | RPL9        | U09953    | 412370  | 1.41 | 2.76 |
| ↑(27) Ribosomal protein S20<br><i>Structural constituent of ribosome</i>                                                                   | RPS20       | L06498    | 8102    | 1.34 | 2.33 |
| ↑(43) Ribosomal protein L23a<br><i>Structural constituent of ribosome</i>                                                                  | RPL23A      | U37230    | 184776  | 1.23 | 2.35 |
| ↑(48) Ribosomal protein L10<br><i>Structural constituent of ribosome</i>                                                                   | RPL10       | M64241    | 401929  | 1.20 | 0.82 |
| ↑(50) Ribosomal protein L7<br><i>Structural constituent of ribosome</i>                                                                    | RPL7        | X57958    | 421257  | 1.18 | 1.89 |
| ↑(67) Ribosomal protein S5<br><i>Structural constituent of ribosome</i>                                                                    | RPS5        | U14970    | 378103  | 1.07 | 0.49 |
| ↑(74) Ribosomal protein S10 (RPS10)<br><i>Structural constituent of ribosome</i>                                                           | RPS10       | U14972    | 406620  | 1.03 | 0.86 |
| ↑(82) Ribosomal protein L10a<br><i>Structural constituent of ribosome</i>                                                                  | RPL10A      | NM_007104 | 14834   | 1.02 | 0.90 |
| ↑(107) Ribosomal protein L14<br><i>Structural constituent of ribosome</i>                                                                  | RPL14       | D87735    | 446522  | 0.94 | 0.63 |
| ↑(122) Integrin beta 4 binding protein<br><i>Translation initiation factor</i>                                                             | ITGB4B<br>P | AF022229  | 534326  | 0.89 | 0.38 |
| ↑(126) Nucleolar protein family A, member 2 (H/ACA small nucleolar RNPs)<br><i>Ribosome biogenesis and assembly</i>                        | NOLA2       | AK000486  | 27222   | 0.89 | 0.16 |
| ↑(134) Eukaryotic translation initiation factor 4 gamma, 1<br><i>Recognition of mRNA cap, recruitment of mRNA to the ribosome</i>          | EIF4G1      | AF104913  | 433750  | 0.84 | 0.17 |
| <b>MITOCHONDRIAL FUNCTIONS</b>                                                                                                             |             |           |         |      |      |
| ↑ 52 NADH dehydrogenase (ubiquinone) Fe-S protein 5, 15kDa (NADH-coenzyme Q reductase)<br><i>Oxidative phosphorylation</i>                 | NDUFS5      | AF047434  | 472185  | 1.17 | 2.03 |
| ↑ 62 NADH dehydrogenase (ubiquinone) 1 alpha subcomplex, 8, 19kDa<br><i>Oxidative phosphorylation</i>                                      | NDUFA<br>8  | NM_014222 | 495039  | 1.10 | 1.62 |
| ↑ 63 ATP synthase, H+ transporting, mitochondrial F0 complex, subunit c (subunit 9), isoform 1<br><i>ATPase activity, proton transport</i> | ATP5G1      | X69907    | 80986   | 1.09 | 1.54 |
| ↑ 73 NADH dehydrogenase (ubiquinone) 1 alpha subcomplex, 6, 14kDa<br><i>Oxidative phosphorylation</i>                                      | NDUFA<br>6  | AF047182  | 274416  | 1.03 | 1.20 |
| ↑ 87 Ubiquinol-cytochrome c reductase hinge                                                                                                | UQCRH       | Y00764    | 481571  | 1.00 | 0.84 |

|                                                                                                                                                                          |                |           |        |      |      |
|--------------------------------------------------------------------------------------------------------------------------------------------------------------------------|----------------|-----------|--------|------|------|
| <b>protein</b><br><i>Oxidative phosphorylation</i>                                                                                                                       |                |           |        |      |      |
| <b>↑ 91 Solute carrier family 9 (sodium/hydrogen exchanger), isoform 6</b><br><i>Ion transport and pH regulation in mitochondrion, microsomes, endoplasmic reticulum</i> | <b>SLC9A6</b>  | AF030409  | 62185  | 0.98 | 0.56 |
| <b>↑ 105 Solute carrier family 25 (mitochondrial carrier; phosphate carrier), member 3</b><br><i>Transport of phosphate into the mitochondrial matrix</i>                | <b>SLC25A3</b> | NM_005888 | 290404 | 0.94 | 0.43 |
| <b>↑ 127 Translocase of inner mitochondrial membrane 8 homolog B (yeast)</b><br><i>Protein translocation through mitochondrial membrane</i>                              | <b>TIMM8B</b>  | NM_012459 | 279915 | 0.87 | 0.28 |
| <b>↑ 133 cytochrome c oxidase subunit VIa polypeptide 1</b><br><i>Oxidative phosphorylation</i>                                                                          | <b>COX6A1</b>  | AL021546  | 497118 | 0.84 | 0.16 |
| <b>↑ 148 Succinate dehydrogenase complex, subunit D, integral membrane protein</b><br><i>Regulation of the activity of mitochondrial complex II</i>                      | <b>SDHD</b>    | AB006202  | 356270 | 0.82 | 0.05 |

M = differential expression ratio after dye-swap normalization; LOR=log odds ratio: all genes with LOR > 0 were considered significantly down-regulated (M<0) or up-regulated (M>0); in italics biological functions are reported; Each gene is univocally identifiable by a number ranging from 1 to 141 with an up-arrow meaning the up-regulation and from 1 to 58 with a down-arrow meaning the down-regulation in SSc-MVEC.
